# Supplementary material
Source: PubMed Central journal article supplement (PMC10445291)

**Fig. 5b**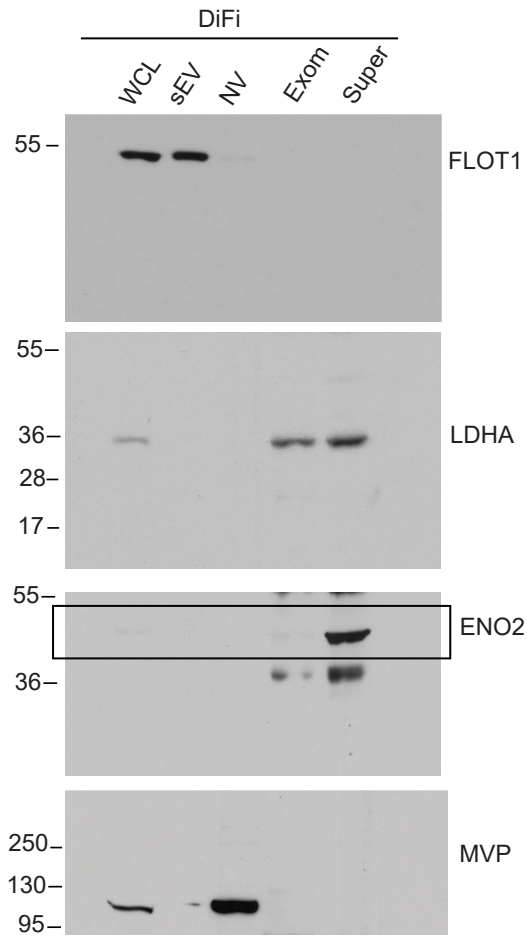**Fig. 5d**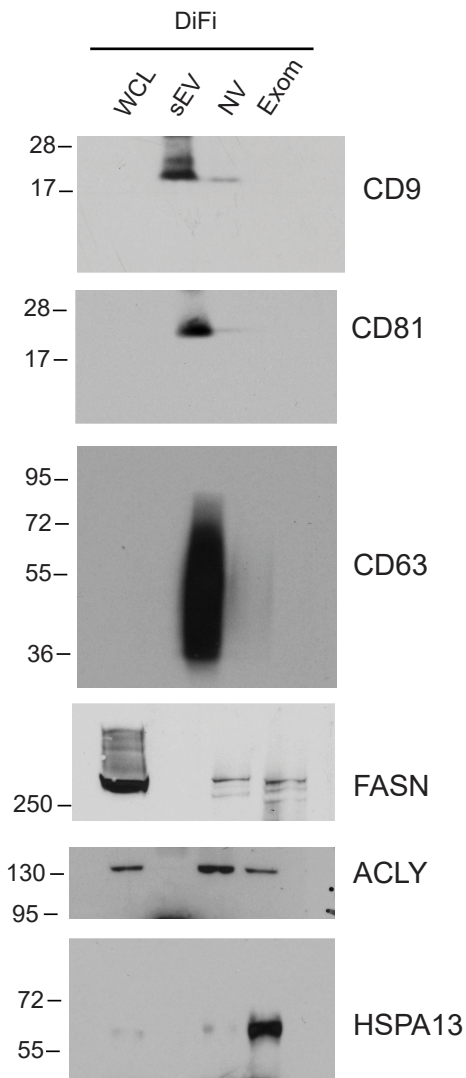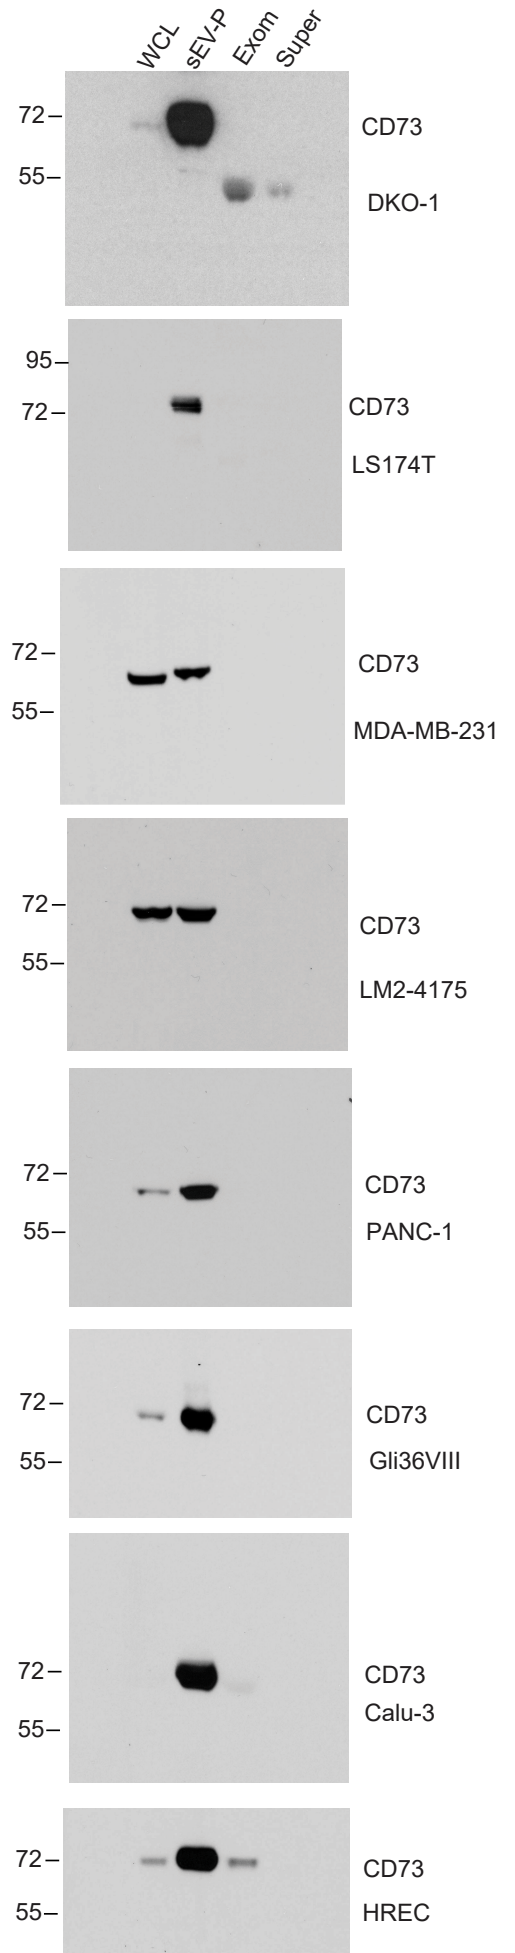

**Fig. 5e**

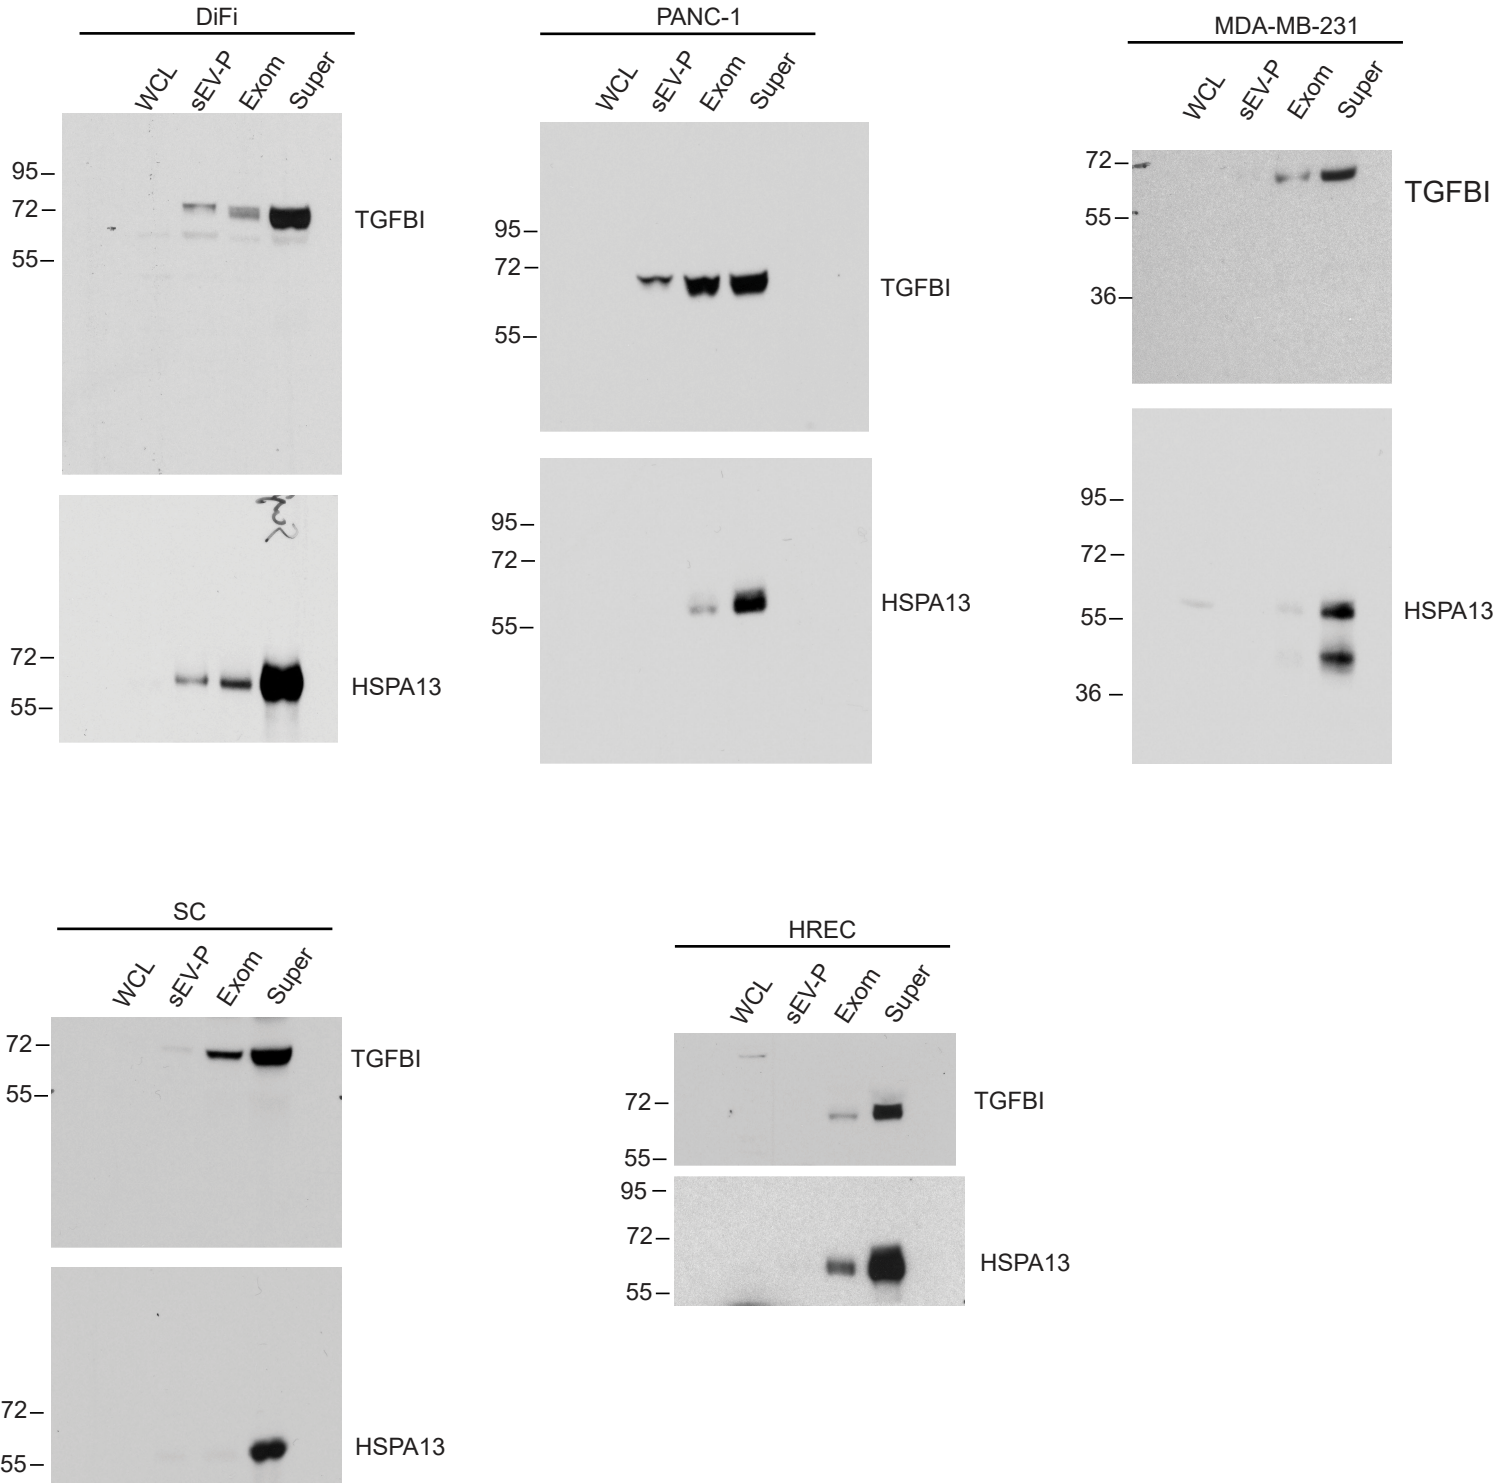

Supplement: NIHMS1914910-supplement-Supplemental_Unmodified_Gels_Fig5_pdf.pdf [file NIHMS1914910-supplement-Supplemental_Unmodified_Gels_Fig5_pdf.pdf]

**Fig. 6b**

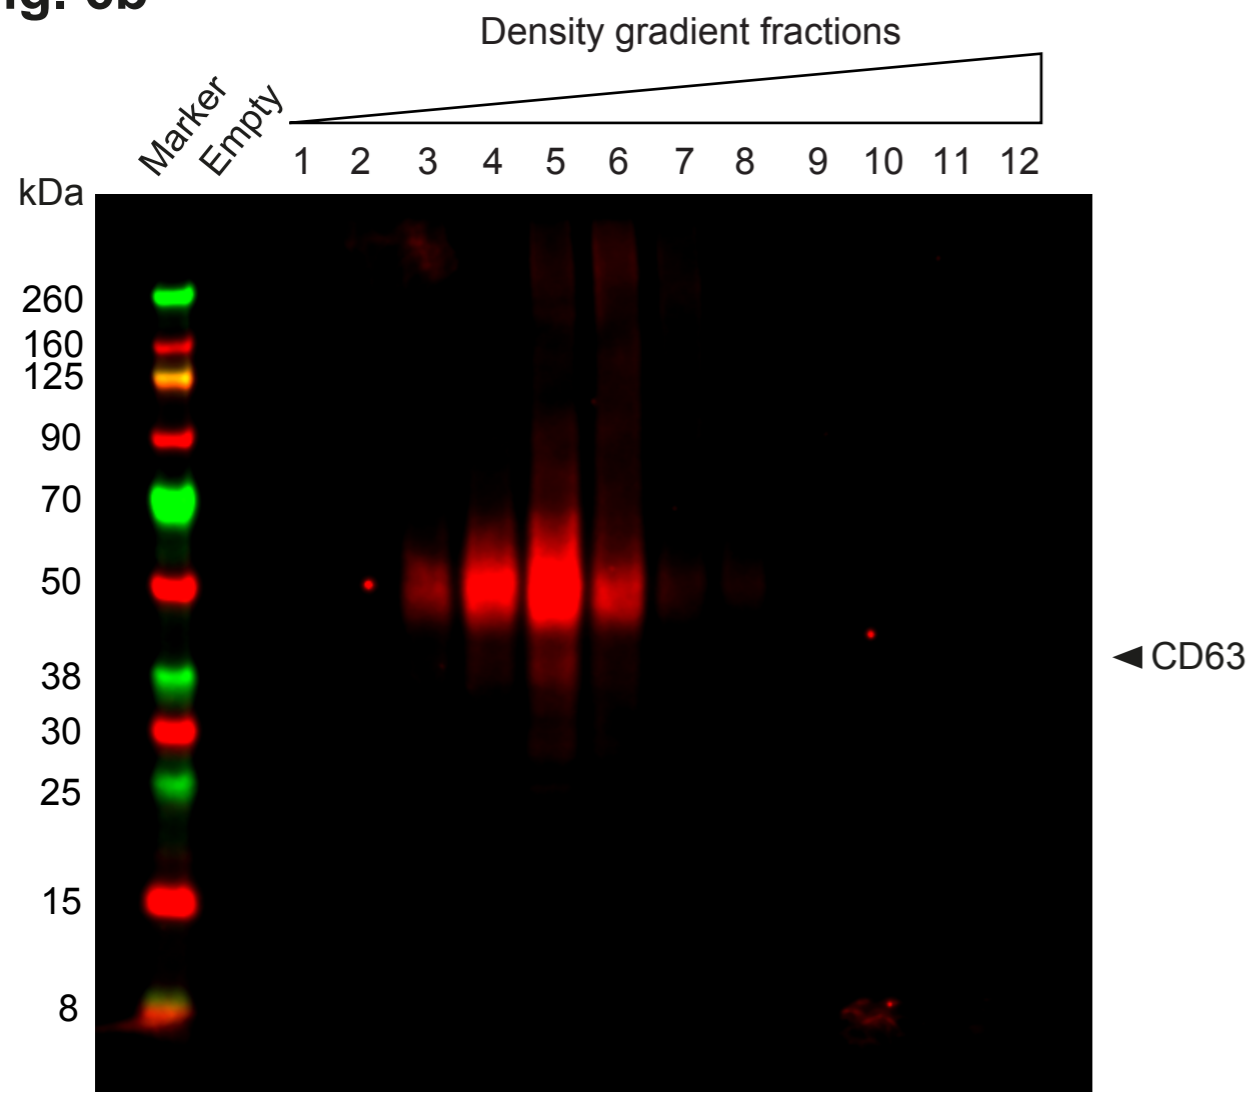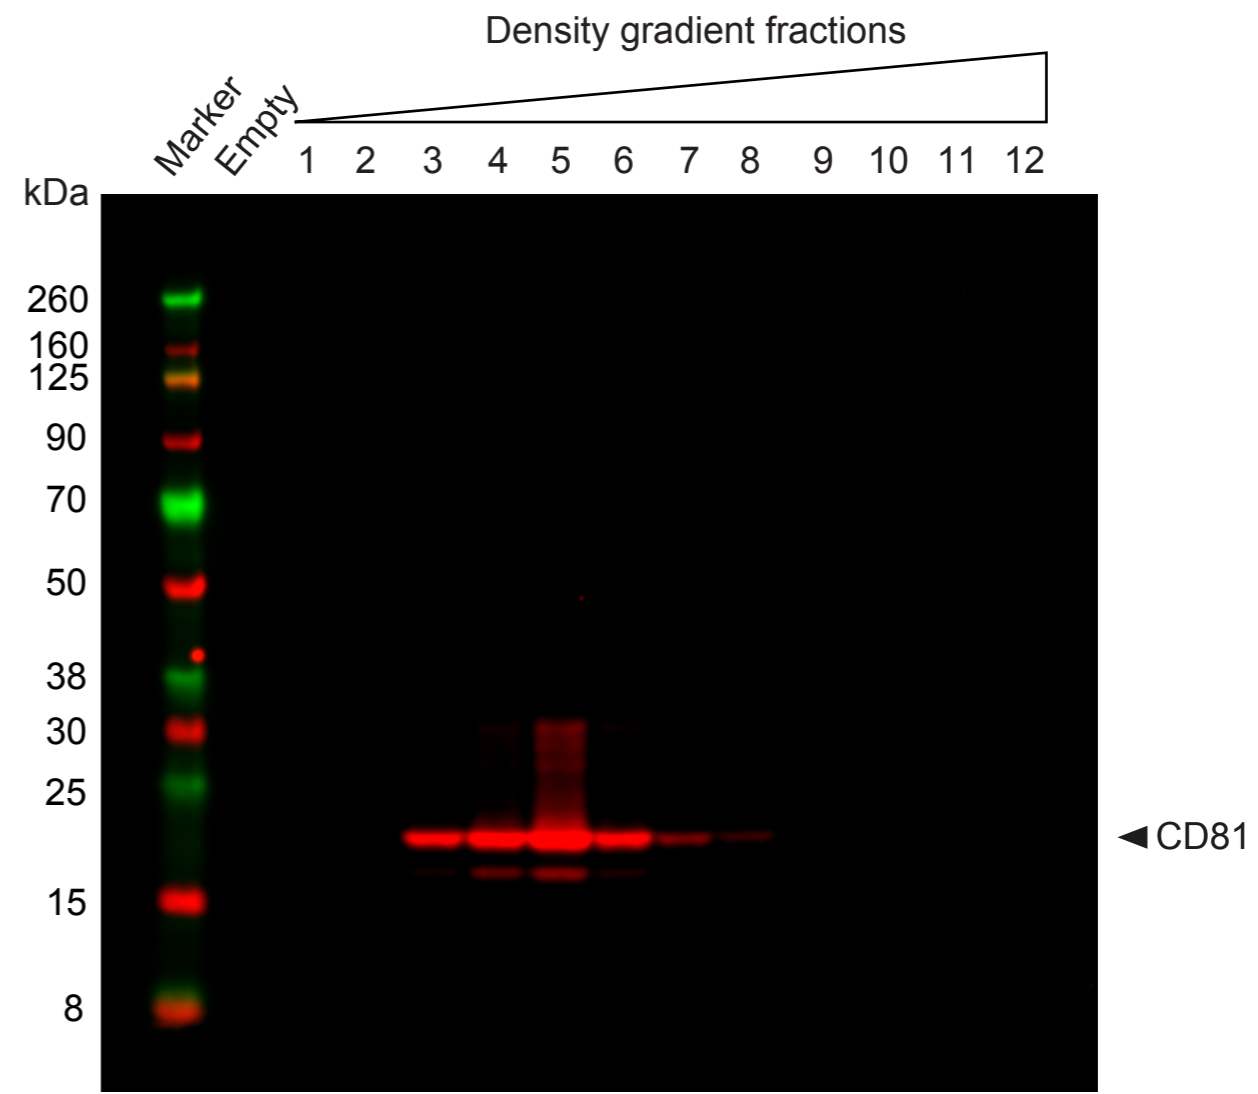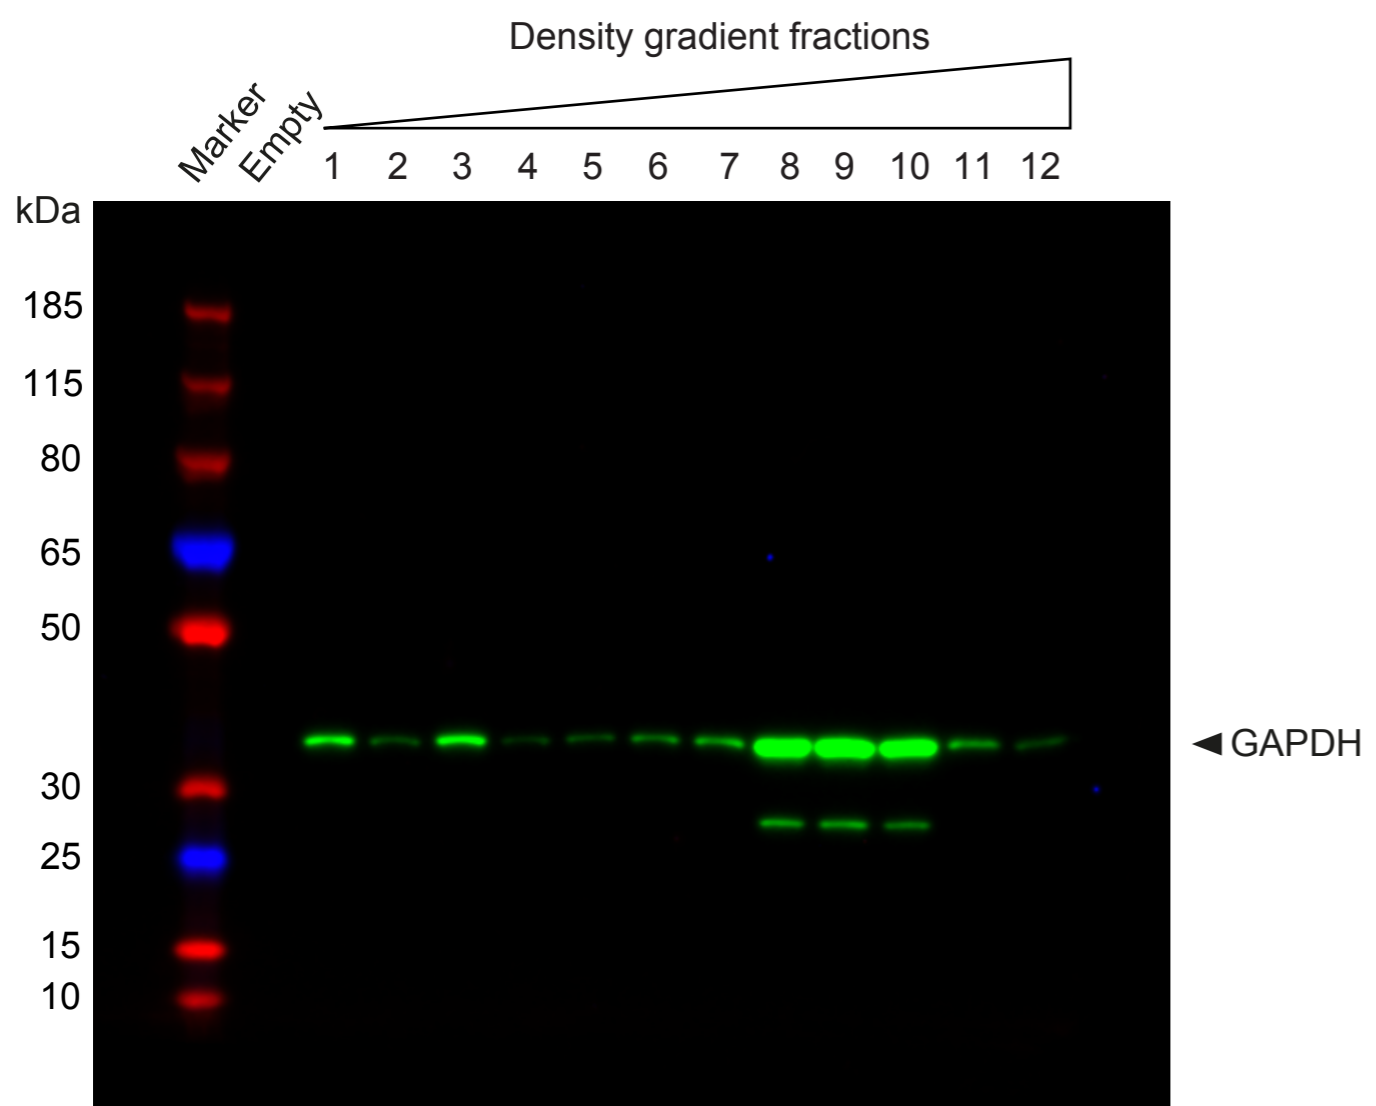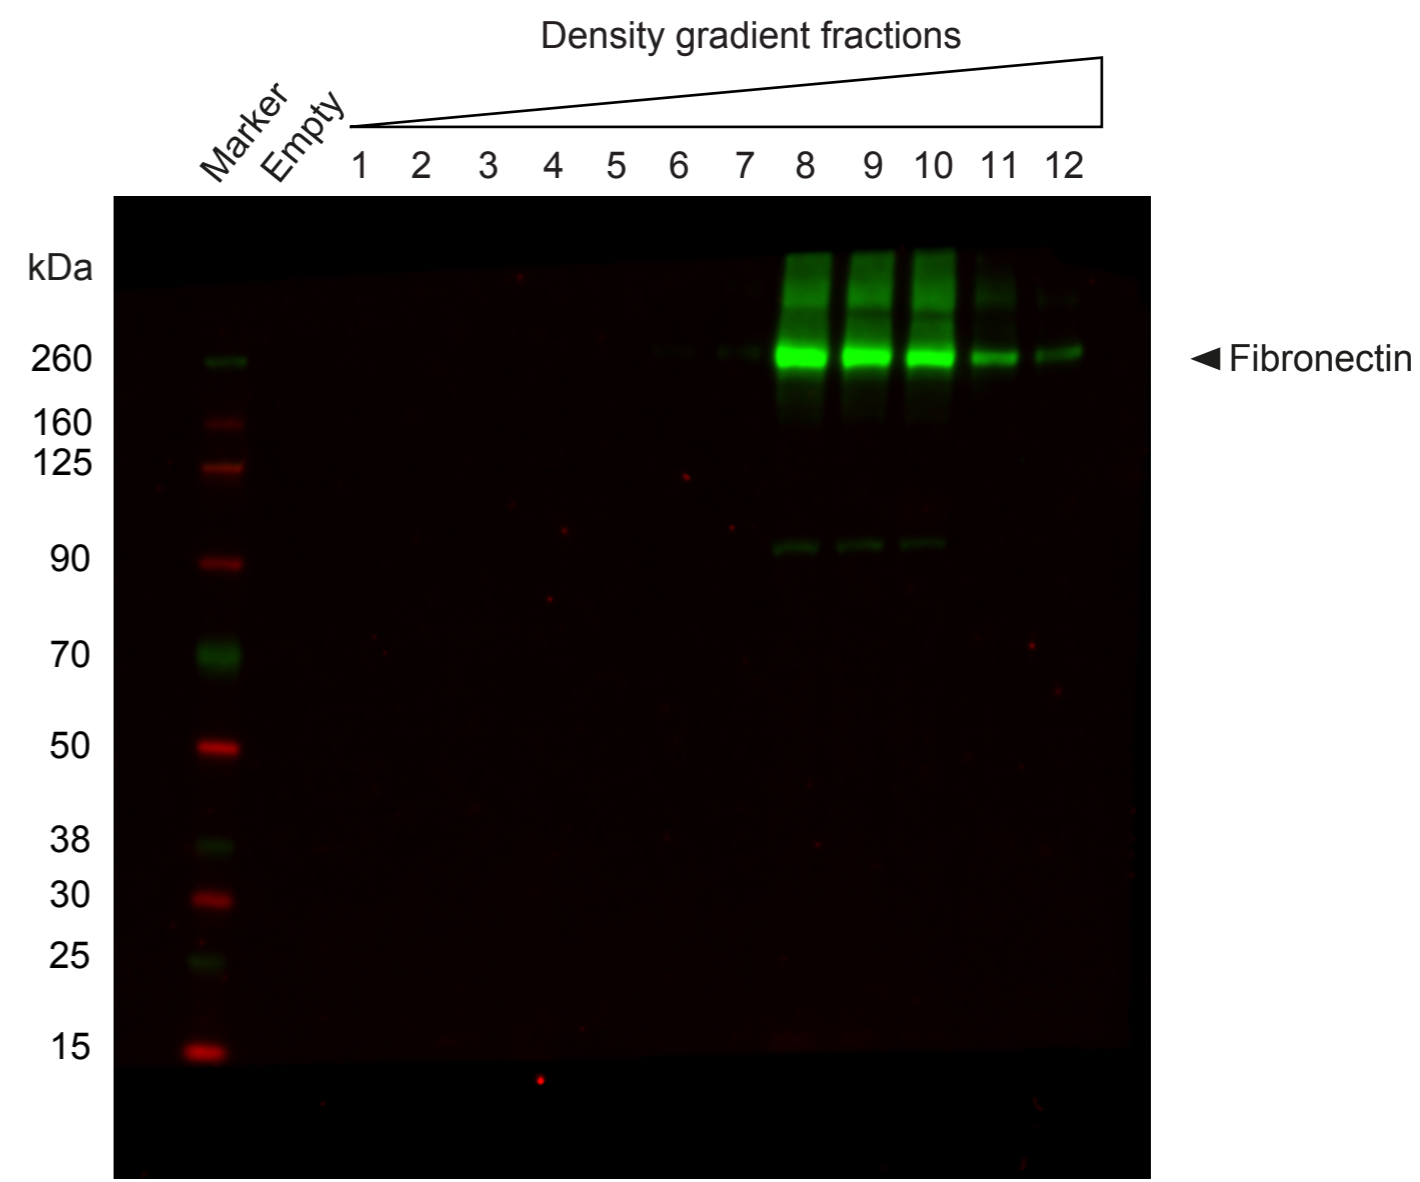

**Fig. 6c - P1**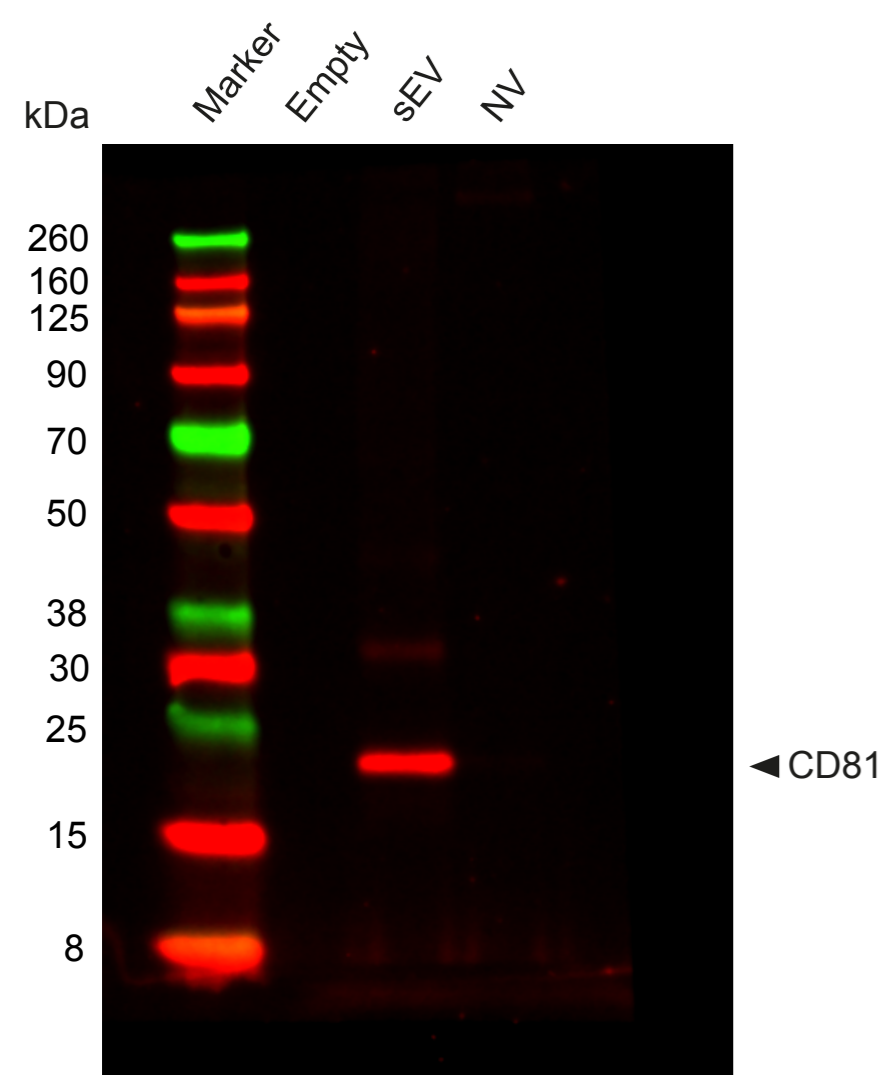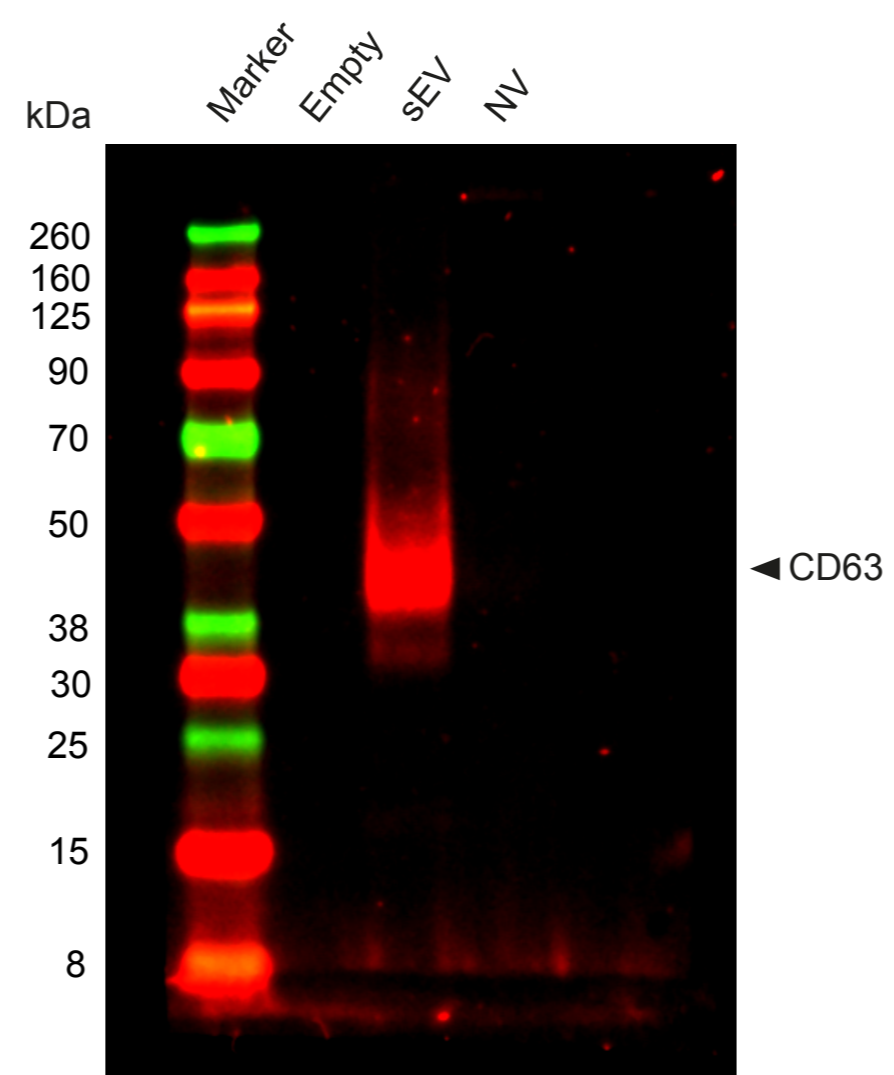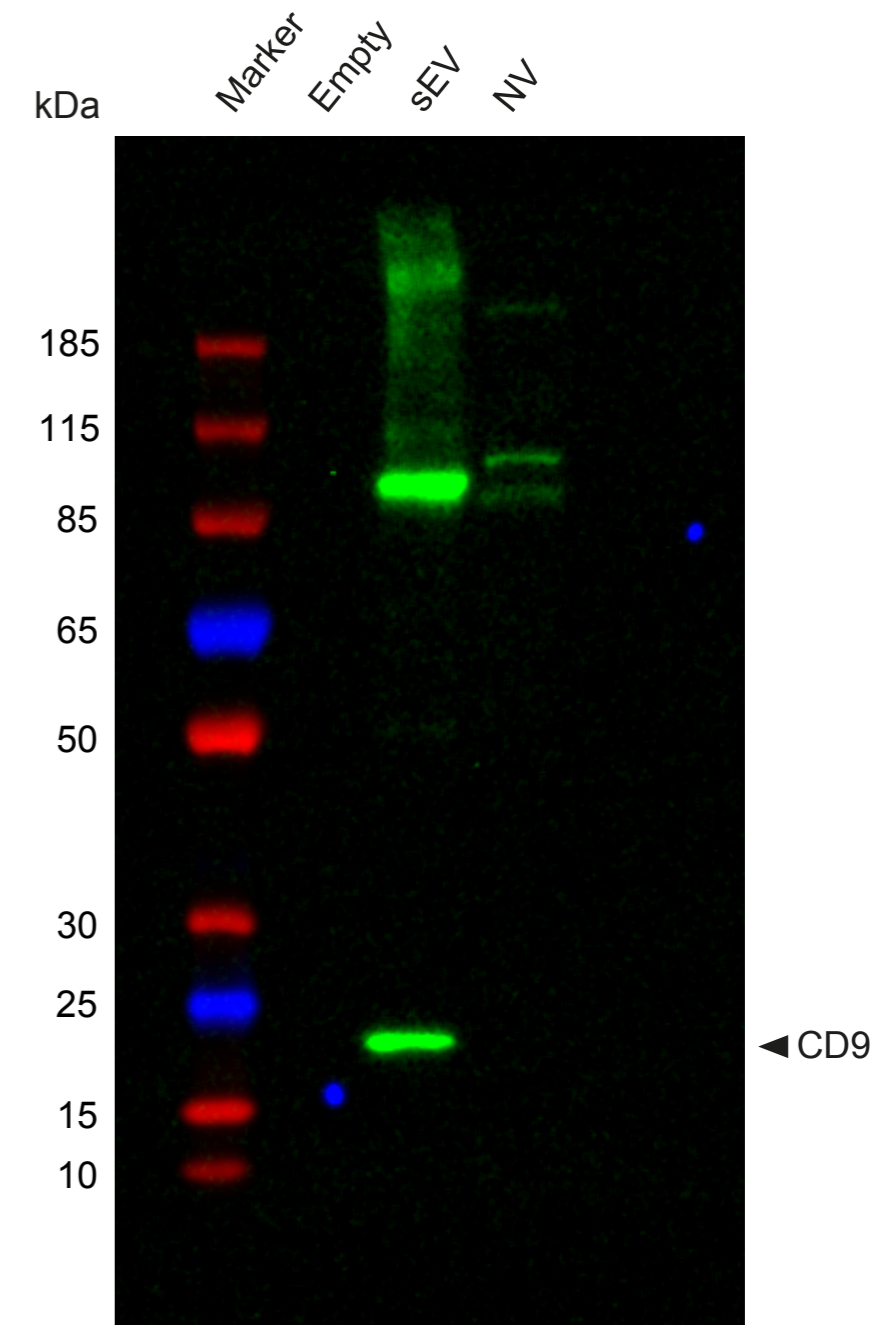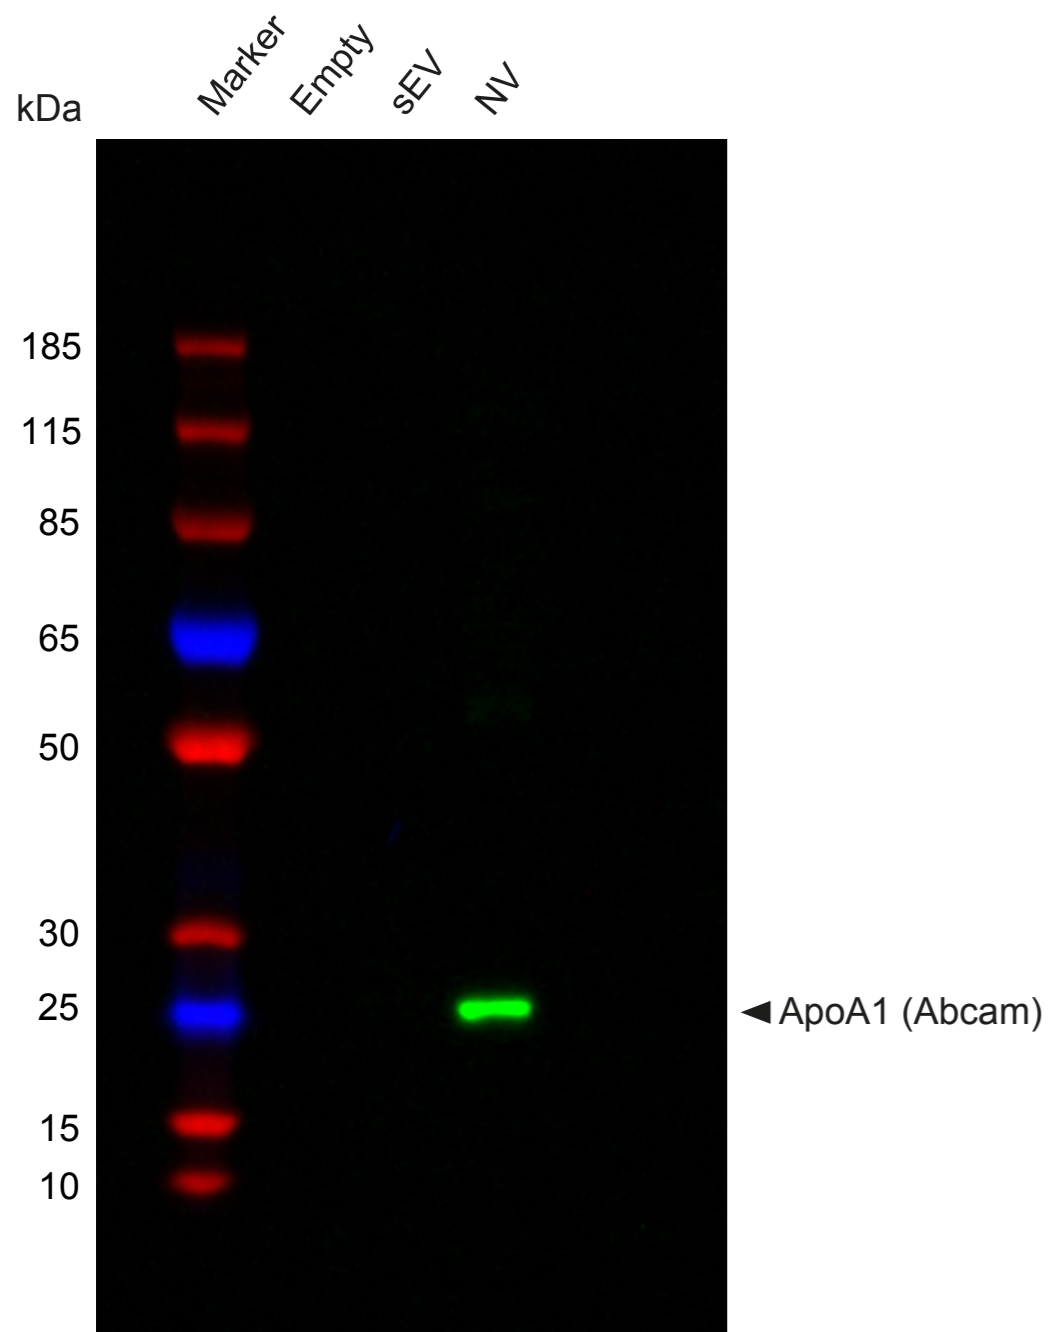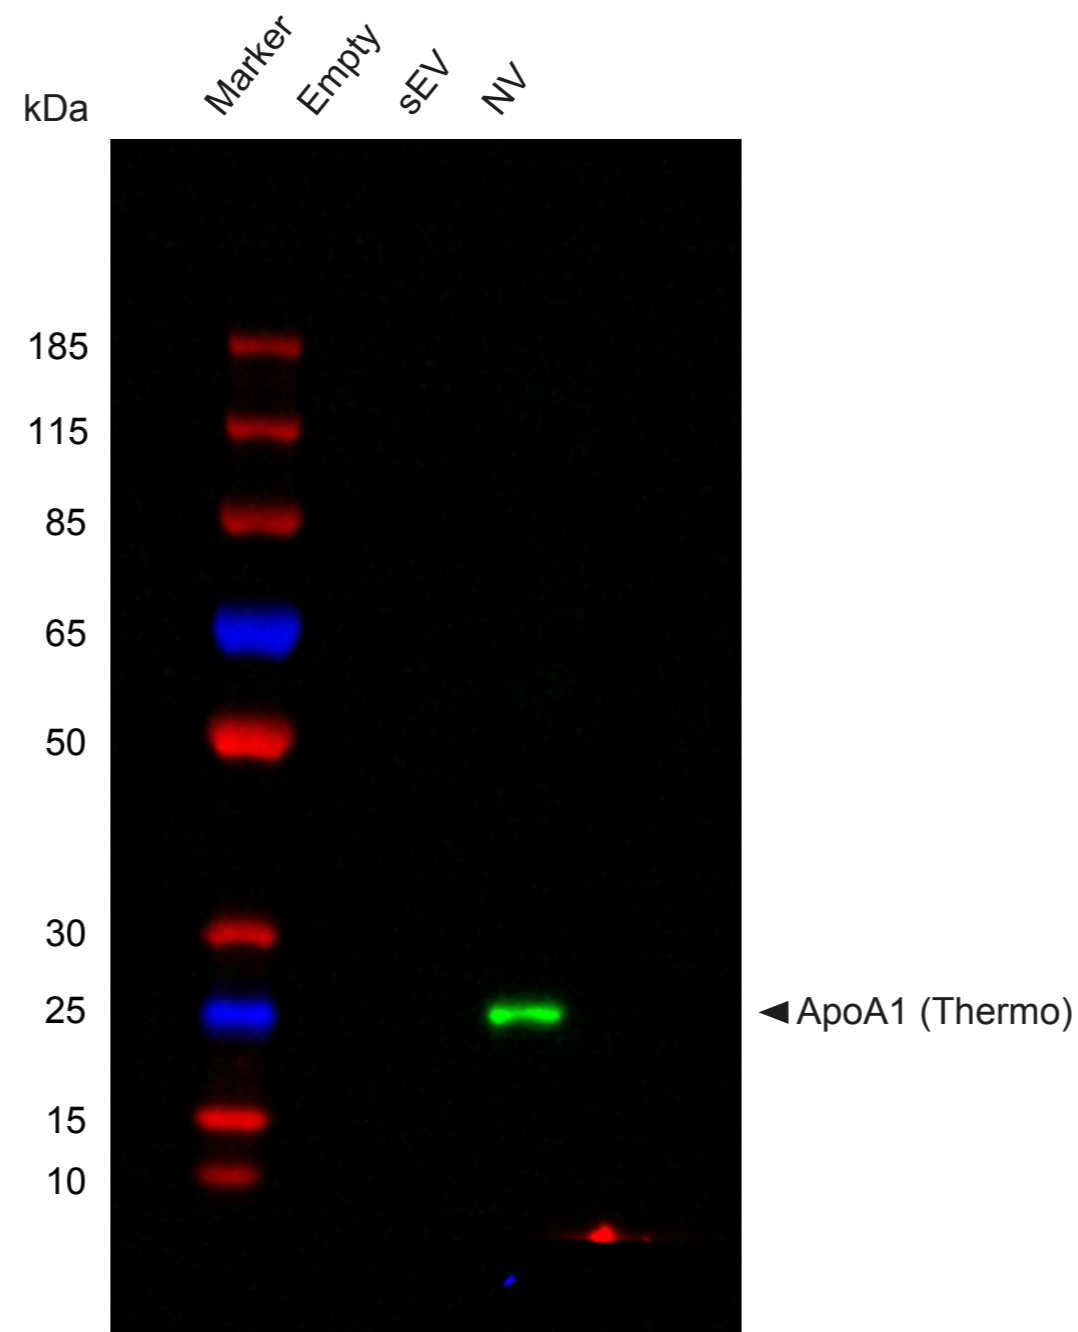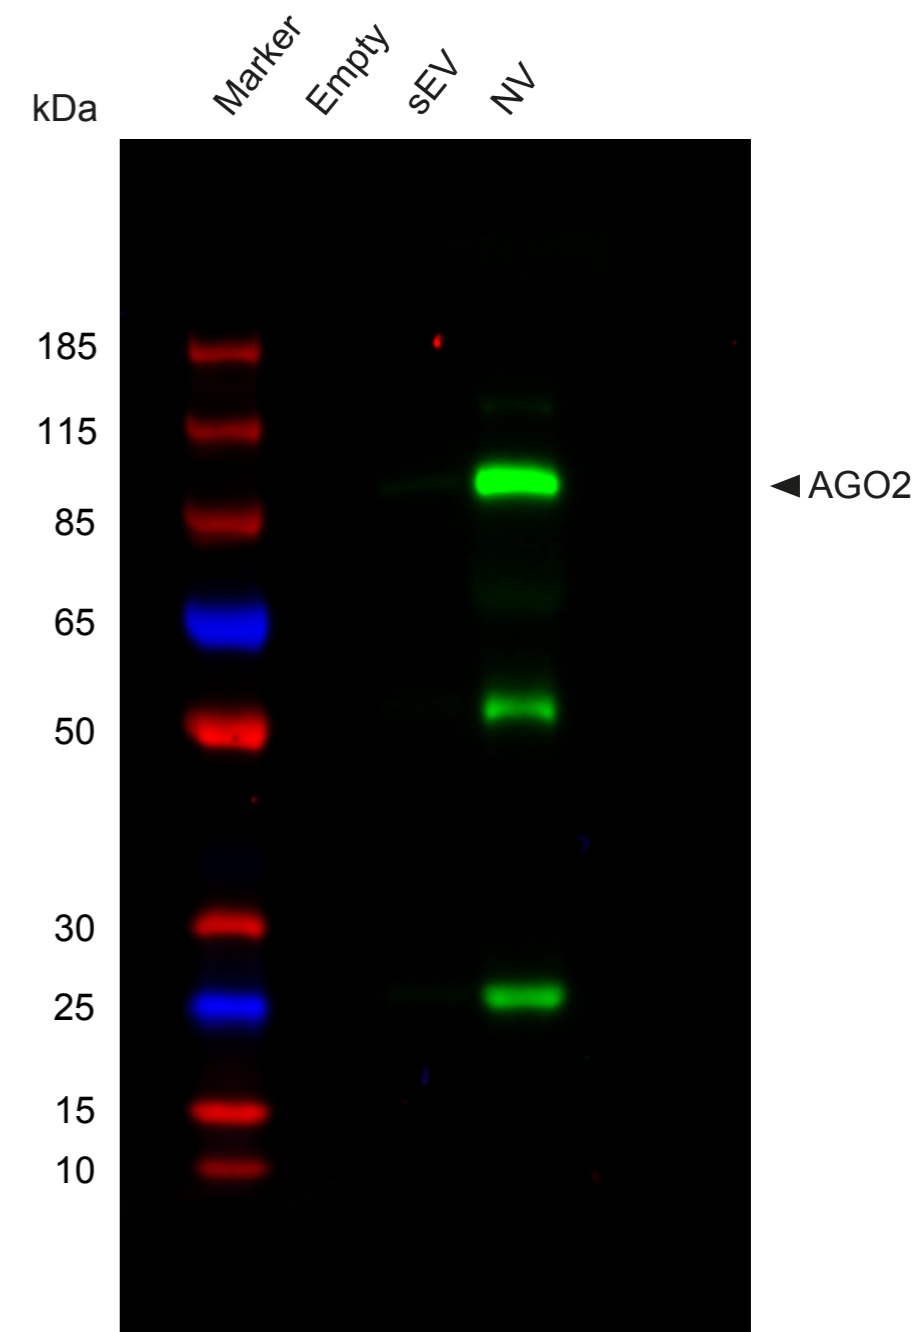**Fig. 6c - P2**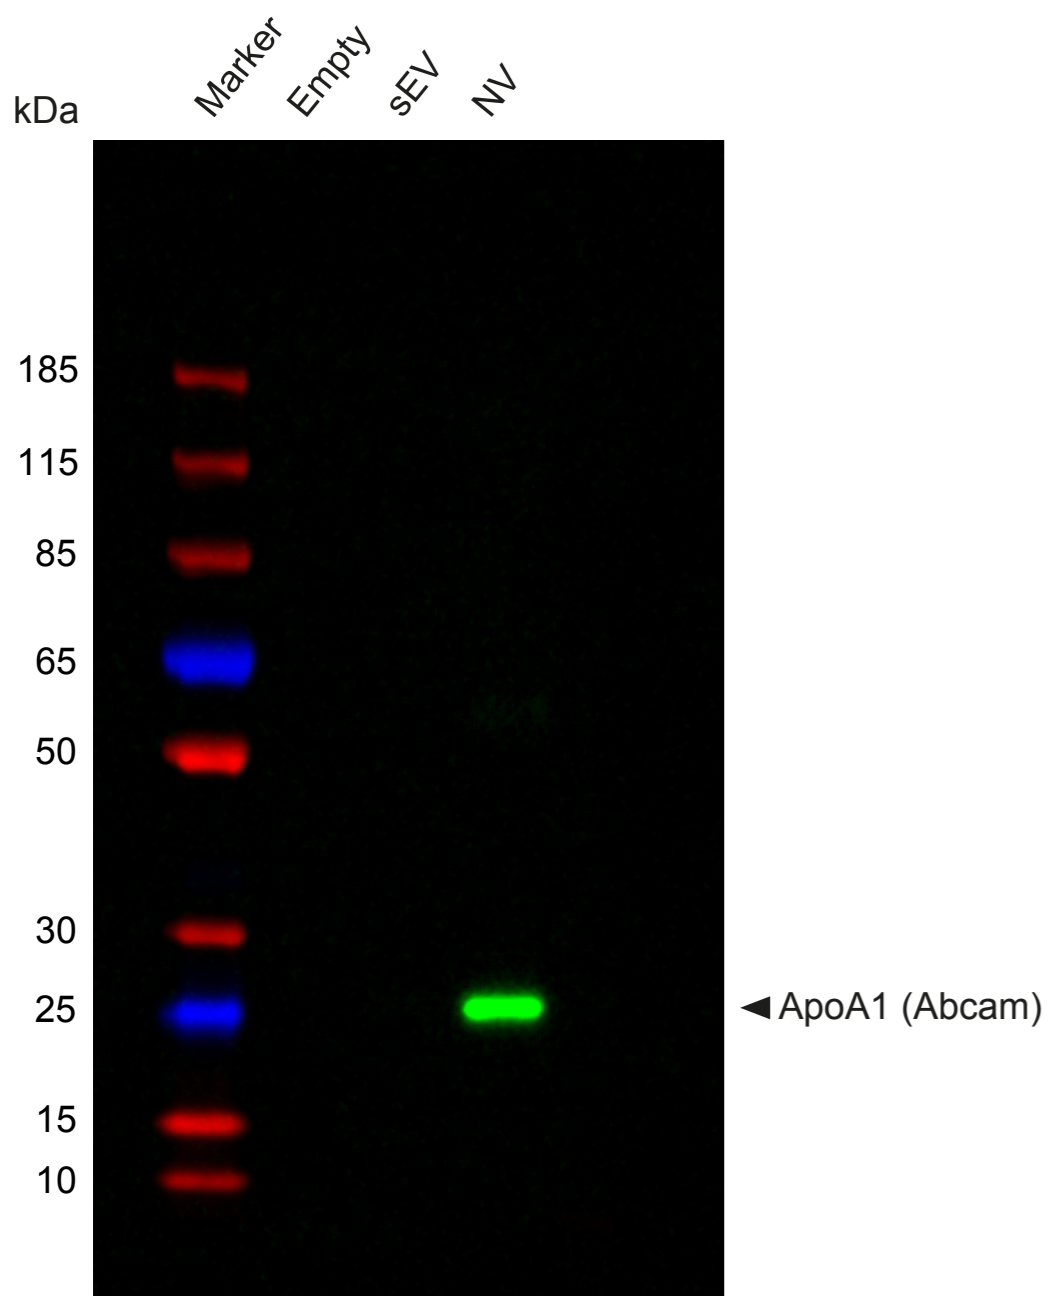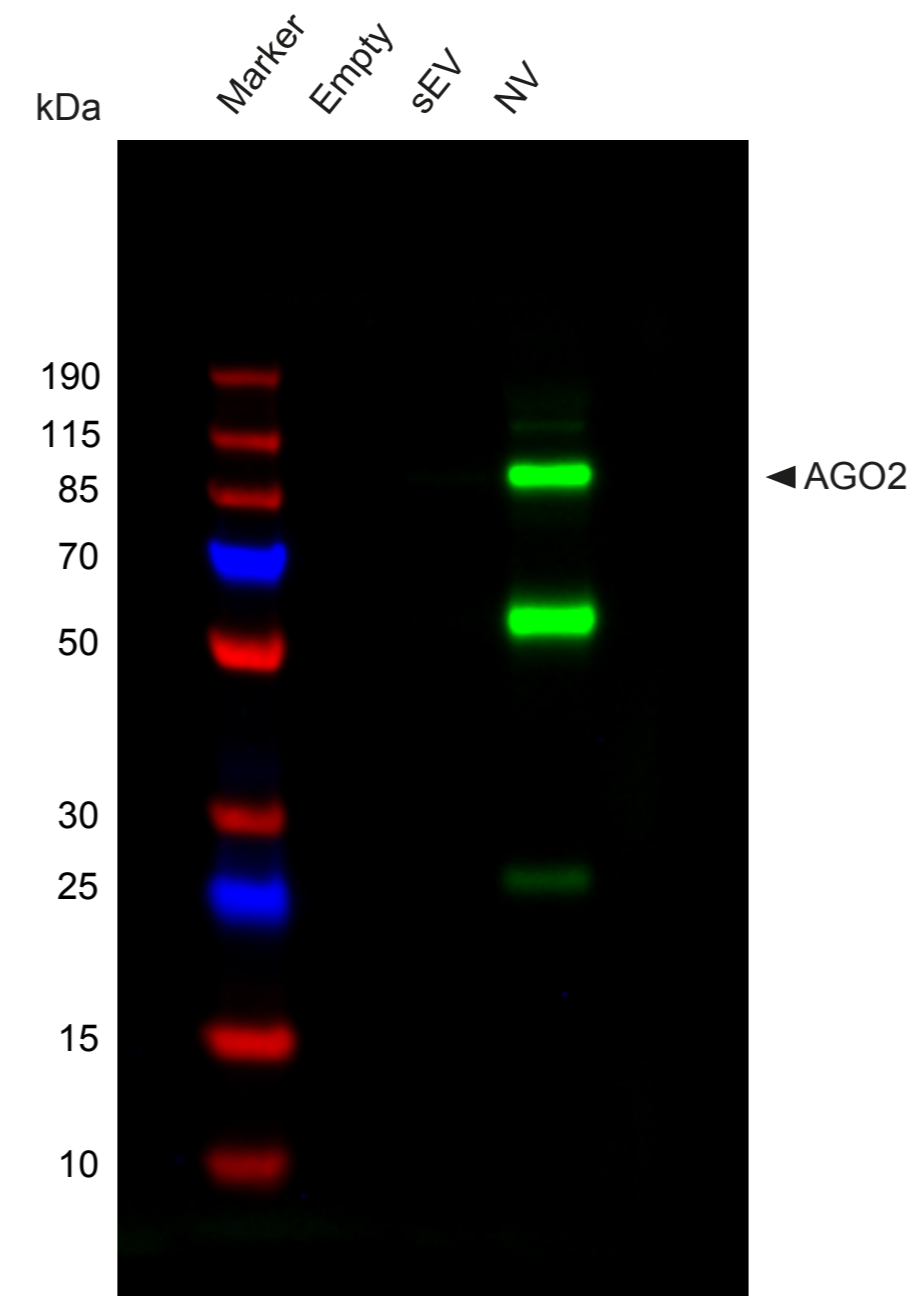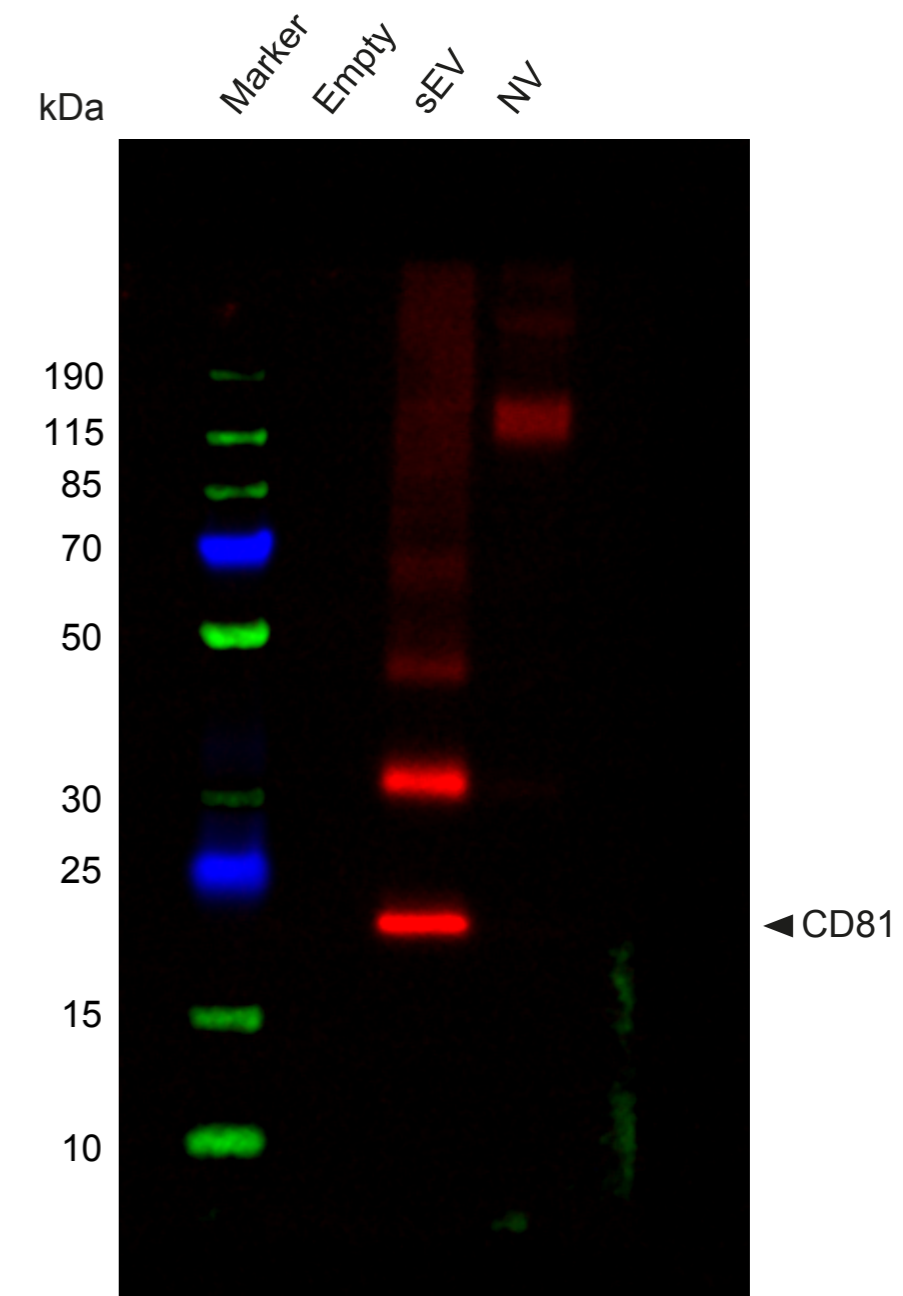**Fig. 6c - P3**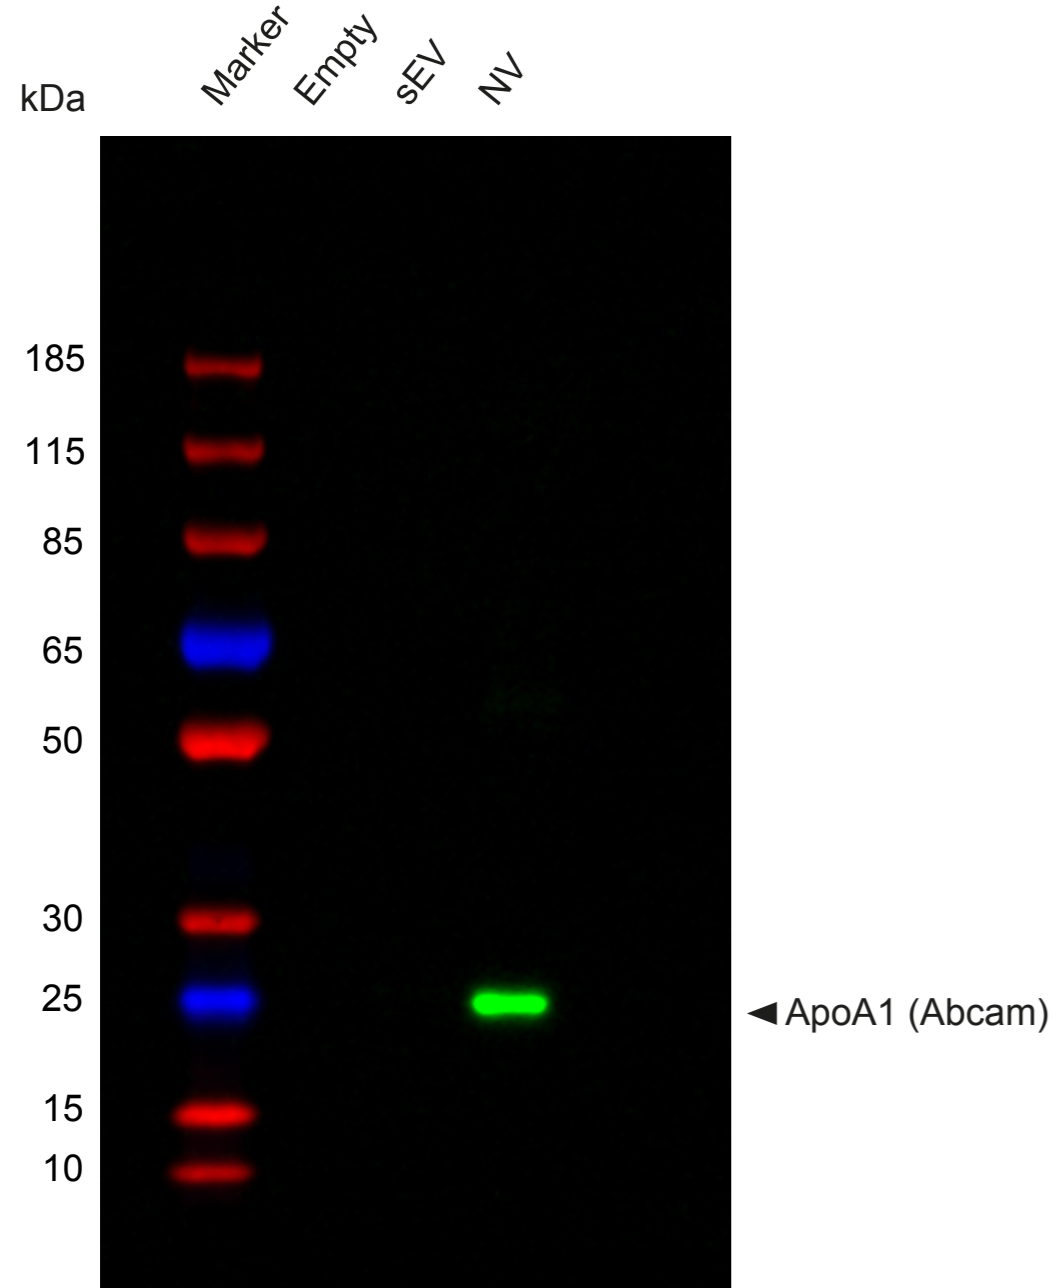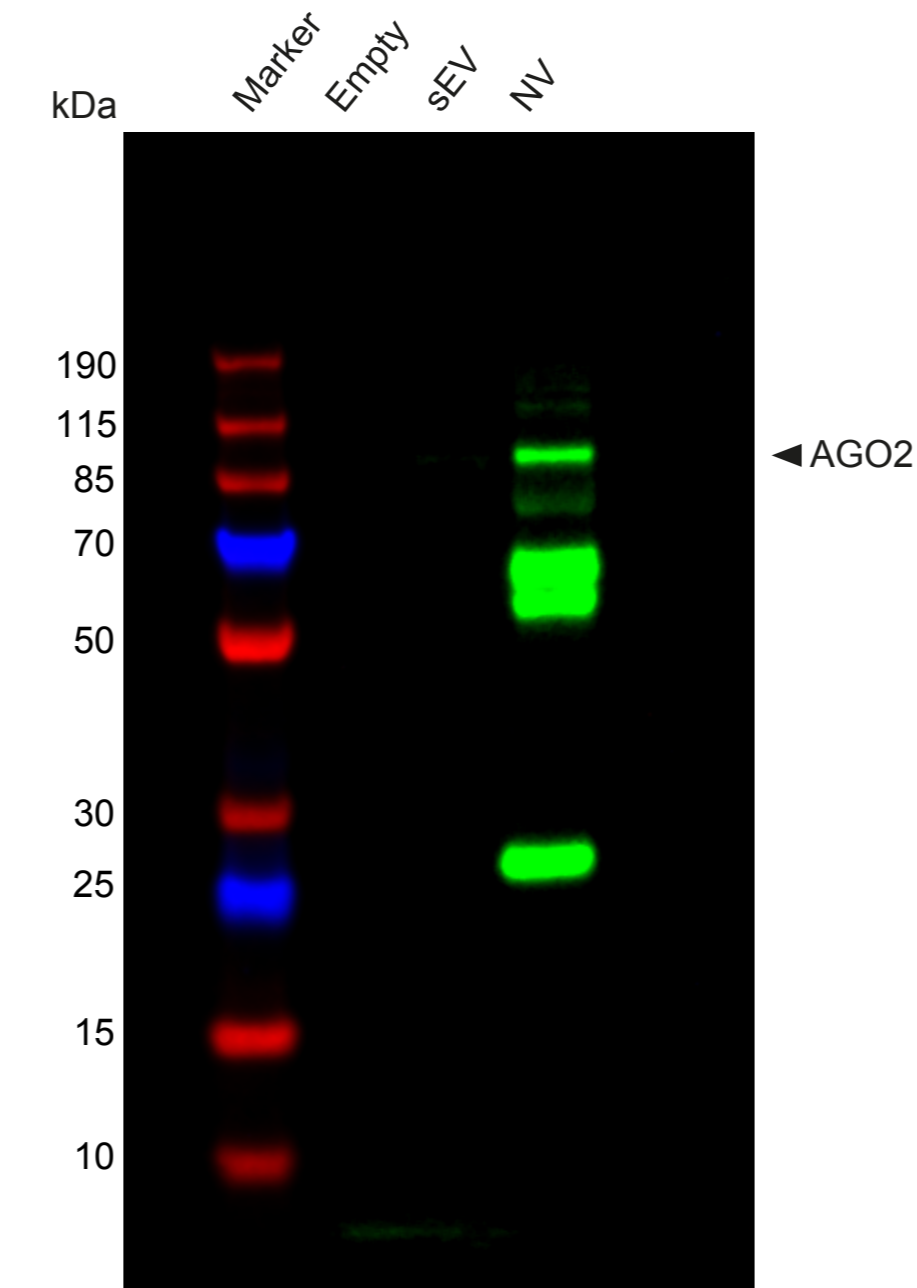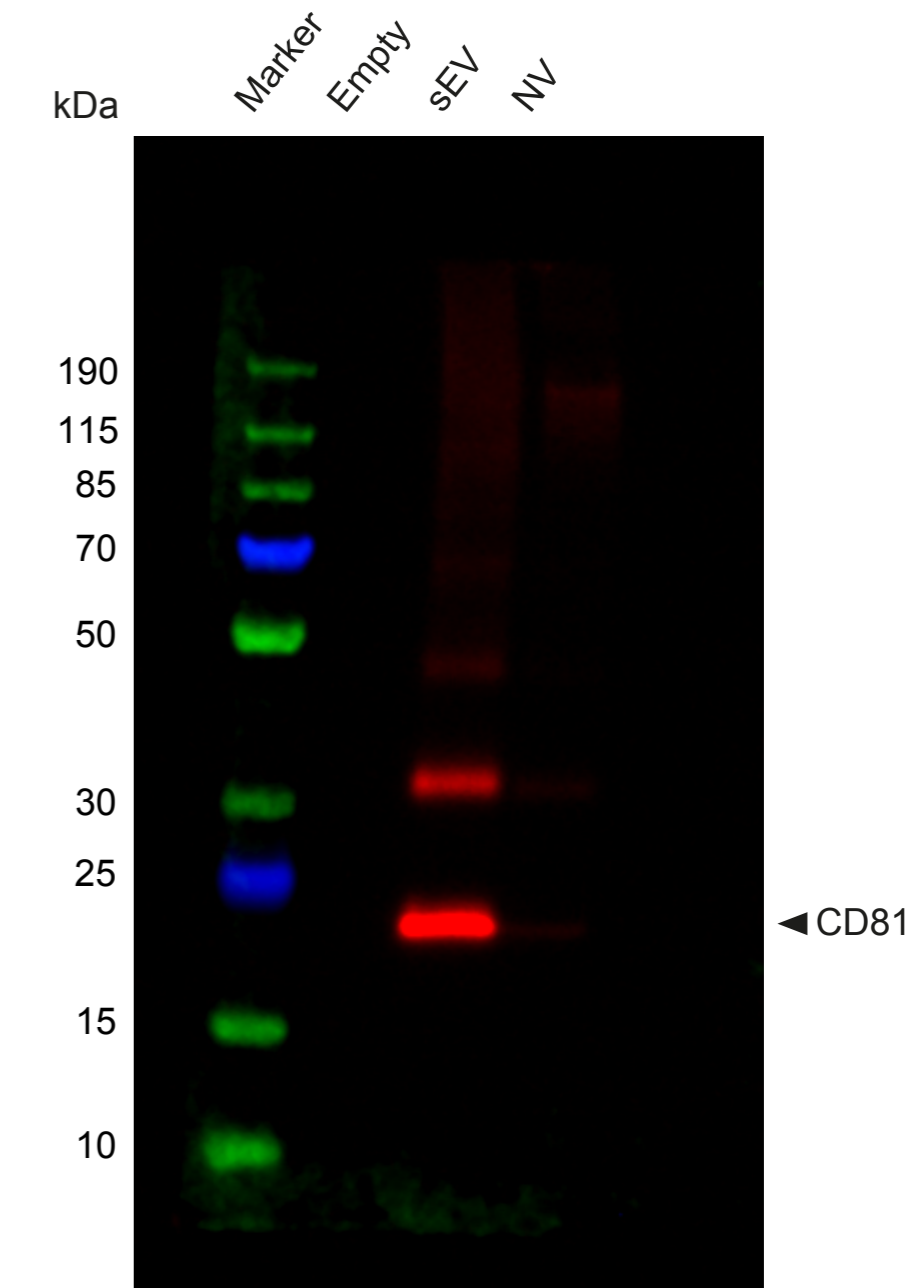

Supplement: NIHMS1914910-supplement-Supplemental_Unmodified_Gels_Fig6_pdf.pdf [file NIHMS1914910-supplement-Supplemental_Unmodified_Gels_Fig6_pdf.pdf]

Original Blots

Fig. 7

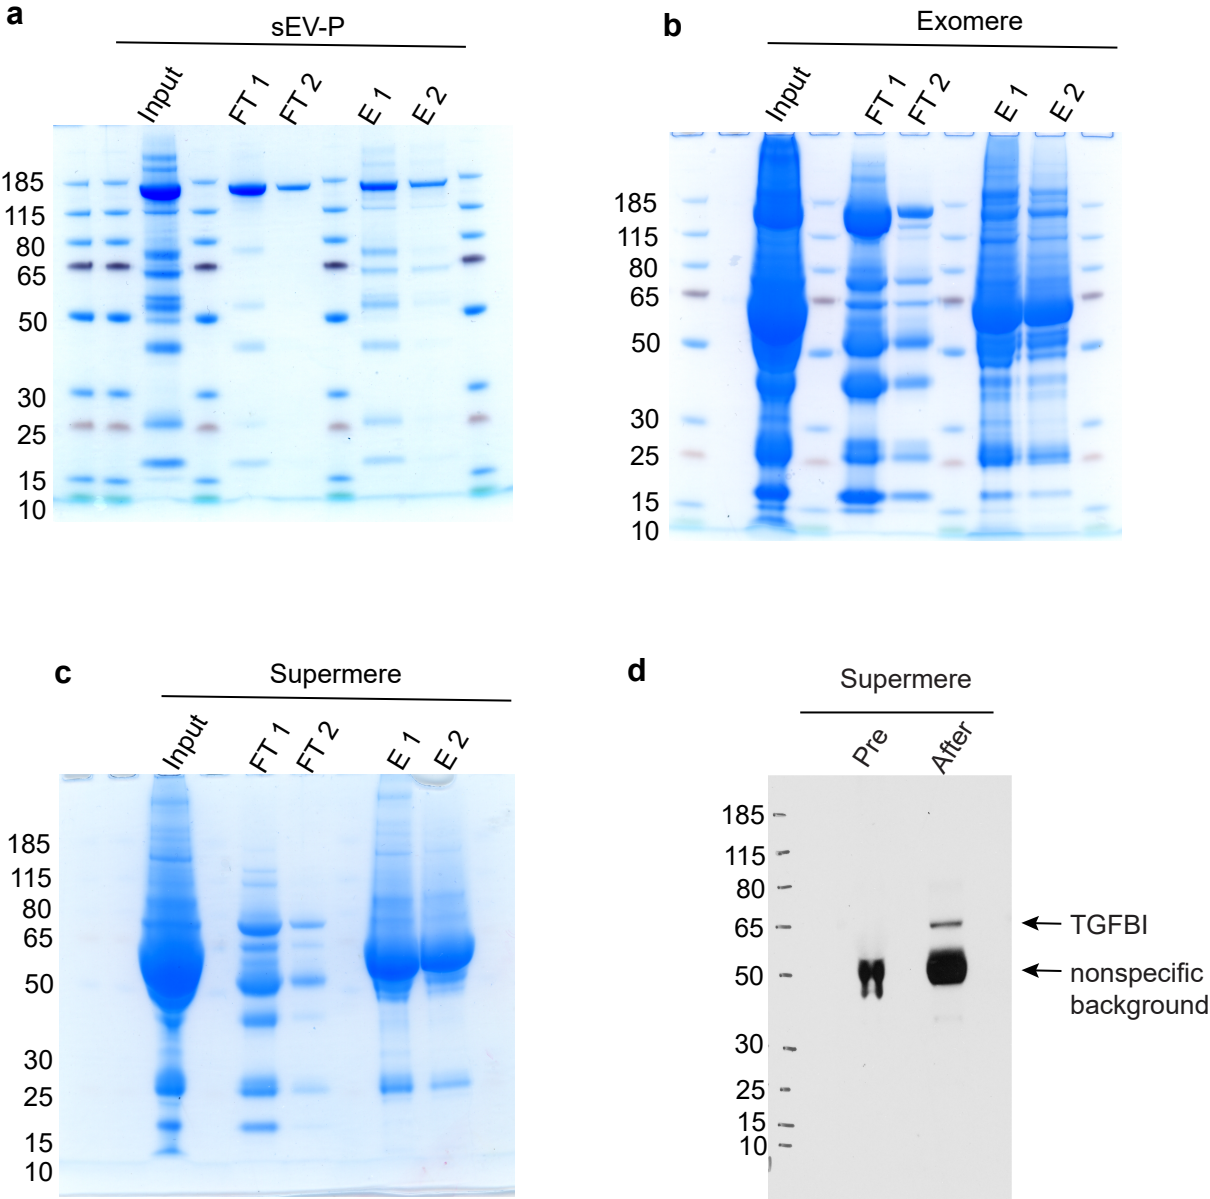

Supplement: NIHMS1914910-supplement-Supplemental_Unmodified_Gels_Fig7_pdf.pdf [file NIHMS1914910-supplement-Supplemental_Unmodified_Gels_Fig7_pdf.pdf]
